# Supplementary material for: Post-covid syndrome in individuals admitted to hospital with covid-19: retrospective cohort study
Source: PubMed Central journal article supplement (PMC8010267; doi:10.1136/bmj.n693), 2021-03-31
Supplement: ayod064273.ww1.pdf [file ayod064273.ww1.pdf]

## Supplementary Appendix: Code lists for outcome variables

### 1. ICD-10 codes for defining outcome variables from HES data

| Condition                         | Codes                    |
|-----------------------------------|--------------------------|
| Heart failure                     | I50                      |
| Stroke                            | I60-64                   |
| Myocardial infarction             | I21-22                   |
| Arrhythmia                        | I47-49                   |
| Respiratory illness               | J00-99                   |
| Chronic kidney disease stages 3-5 | N18.3-18.5, Z94.0, Z99.2 |
| Chronic liver disease             | K70-77                   |
| Type 1 diabetes mellitus          | E10                      |
| Type 2 diabetes mellitus          | E11                      |

### 2. SNOMED codes for defining outcome variables from GDPPR data

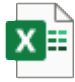

GDPPR code lists.xlsx
