# Supplementary material for: Post-covid syndrome in individuals admitted to hospital with covid-19: retrospective cohort study
Source: PubMed Central journal article supplement (PMC8010267; doi:10.1136/bmj.n693), 2021-03-31
Supplement: ayod064273.ww2.pdf [file ayod064273.ww2.pdf]

Supplementary Table 1. Description of variables used to match COVID-19 and control patients

| Variable                       | Categorisation                                                                                                                                                      |
|--------------------------------|---------------------------------------------------------------------------------------------------------------------------------------------------------------------|
| Age group                      | <50 years, 50-69 years, ≥70 years                                                                                                                                   |
| Sex                            | Female, male                                                                                                                                                        |
| Ethnic group                   | Asian, Black, White, Mixed/Other, Unknown                                                                                                                           |
| Region of residence            | North (North East, North West, Yorkshire and the Humber), South (East of England, London, South East, South West), Midlands (East Midlands, West Midlands), Unknown |
| IMD quintile                   | 1 (most deprived), 2, 3, 4, 5 (least deprived), Unknown                                                                                                             |
| Smoking status                 | Current, Former, Never/Unknown                                                                                                                                      |
| BMI group                      | <25 kg/m <sup>2</sup> or Unknown, 25 kg/m <sup>2</sup> to <30 kg/m <sup>2</sup> , ≥30 kg/m <sup>2</sup>                                                             |
| History of hypertension        | Yes, No                                                                                                                                                             |
| History of MACE                | Yes, No                                                                                                                                                             |
| History of respiratory disease | Yes, No                                                                                                                                                             |
| History of CKD stages 3-5      | Yes, No                                                                                                                                                             |
| History of CLD                 | Yes, No                                                                                                                                                             |
| History of diabetes            | Yes, No                                                                                                                                                             |
| History of cancer              | Yes, No                                                                                                                                                             |

Table notes: BMI: body mass index; CKD: chronic kidney disease; CLD: chronic liver disease; IMD: Index of Multiple Deprivation; MACE: major adverse cardiovascular event (a composite of heart failure, myocardial infarction, stroke, and arrhythmia).

Supplementary Table 2. Counts and rates of adverse events contrasting individuals with COVID-19 in England discharged from hospital by 31 August 2020 with matched controls

| Adverse event<br>(sample size per group)         | COVID-19 cases    |                                          | Control group    |                                          |
|--------------------------------------------------|-------------------|------------------------------------------|------------------|------------------------------------------|
|                                                  | Events<br>(n, %)  | Rate per 1,000 person-<br>years (95% CI) | Events<br>(n, %) | Rate per 1,000 person-<br>years (95% CI) |
| Death<br>(n = 47,780)                            | 5,875<br>(12.3%)  | 320.0<br>(311.9 to 328.3)                | 830<br>(1.7%)    | 41.3<br>(38.6 to 44.3)                   |
| Readmission to hospital<br>(n = 47,780)          | 14,060<br>(29.4%) | 766.0<br>(753.4 to 778.8)                | 4,385<br>(9.2%)  | 218.9<br>(212.4 to 225.4)                |
| Respiratory disease (all events)<br>(n = 47,780) | 14,140<br>(29.6%) | 770.5<br>(757.8 to 783.3)                | 2,585<br>(5.4%)  | 129.1<br>(124.2 to 134.2)                |
| Respiratory disease (new onset)<br>(n = 28,335)  | 6,085<br>(21.5%)  | 538.9<br>(525.5 to 552.6)                | 240<br>(0.8%)    | 19.7<br>(17.3 to 22.4)                   |
| Diabetes (all events)<br>(n = 47,780)            | 2,330<br>(4.9%)   | 126.9<br>(121.8 to 132.2)                | 1,725<br>(3.6%)  | 86.0<br>(82.0 to 90.2)                   |
| Diabetes (new onset)<br>(n = 36,100)             | 400<br>(1.1%)     | 28.7<br>(26.0 to 31.7)                   | 125<br>(0.3%)    | 8.2<br>(6.9 to 9.8)                      |
| MACE (all events)<br>(n = 47,780)                | 2,315<br>(4.8%)   | 126.1<br>(121.0 to 131.4)                | 855<br>(1.8%)    | 42.6<br>(39.8 to 45.5)                   |
| MACE (new onset)<br>(n = 36,130)                 | 945<br>(2.6%)     | 65.9<br>(61.8 to 70.3)                   | 190<br>(0.5%)    | 12.3<br>(10.6 to 14.1)                   |
| CKD (all events)<br>(n = 47,780)                 | 710<br>(1.5%)     | 38.7<br>(35.9 to 41.6)                   | 410<br>(0.9%)    | 20.4<br>(18.5 to 22.5)                   |
| CKD (new onset)<br>(n = 41,705)                  | 240<br>(0.6%)     | 14.6<br>(12.8 to 16.6)                   | 125<br>(0.3%)    | 7.2<br>(6.0 to 8.5)                      |
| CLD (all events)<br>(n = 47,780)                 | 135<br>(0.3%)     | 7.2<br>(6.1 to 8.6)                      | 50<br>(0.1%)     | 2.5<br>(1.9 to 3.3)                      |
| CLD (new onset)<br>(n = 46,395)                  | 70<br>(0.2%)      | 4.0<br>(3.2 to 5.1)                      | 15<br>(0.04%)    | 0.9<br>(0.5 to 1.4)                      |

Table notes: CI: confidence interval; CKD: chronic kidney disease stages 3-5; CLD: chronic liver disease; MACE: major adverse cardiovascular event. Adverse events calculated from hospital episodes to 31 August 2020, and primary care records and deaths registrations to 30 September 2020. 'Readmission to hospital' represents any admission after discharge for COVID-19 cases, and any post-index admission for controls. COVID-19 cases were matched to controls on baseline demographic characteristics (age, sex, ethnicity, region, Index of Multiple Deprivation quintile, smoking status) and clinical histories (hypertension, major adverse cardiovascular event, respiratory disease, chronic kidney disease, chronic liver disease, diabetes, cancer).

Supplementary Table 3. Counts and rates of adverse events contrasting individuals with COVID-19 in England discharged from hospital by 31 August 2020 with matched controls, stratified by ICU versus non-ICU admission

| Group (sample size)           | Adverse event       | COVID-19 cases |                                      | Control group |                                      |
|-------------------------------|---------------------|----------------|--------------------------------------|---------------|--------------------------------------|
|                               |                     | Events (n, %)  | Rate per 1,000 person-years (95% CI) | Events (n, %) | Rate per 1,000 person-years (95% CI) |
| ICU patients (n = 4,745)      | Death               | 420 (8.8%)     | 237.9 (215.7 to 261.8)               | 20 (0.5%)     | 11.4 (7.2 to 17.3)                   |
|                               | Readmission         | 1,235 (26.0%)  | 701.2 (662.6 to 741.4)               | 260 (5.5%)    | 134.8 (118.9 to 152.2)               |
|                               | Respiratory disease | 1,620 (34.1%)  | 918.6 (874.4 to 964.5)               | 100 (2.1%)    | 53.1 (43.3 to 64.4)                  |
|                               | Diabetes            | 335 (7.1%)     | 190.2 (170.4 to 211.7)               | 175 (3.6%)    | 90.0 (77.1 to 104.5)                 |
|                               | MACE                | 175 (3.6%)     | 98.2 (84.1 to 114.0)                 | 30 (0.6%)     | 15.1 (10.1 to 21.7)                  |
|                               | CKD                 | 65 (1.3%)      | 35.8 (27.5 to 45.8)                  | 20 (0.4%)     | 9.4 (5.6 to 14.8)                    |
| Non-ICU patients (n = 43,035) | Death               | 5,455 (12.7%)  | 328.8 (320.1 to 337.6)               | 805 (1.9%)    | 44.5 (41.5 to 47.7)                  |
|                               | Readmission         | 12,825 (29.8%) | 772.9 (759.5 to 786.4)               | 4,125 (9.6%)  | 227.8 (220.9 to 234.8)               |
|                               | Respiratory disease | 12,525 (29.1%) | 754.7 (741.6 to 768.1)               | 2,485 (5.8%)  | 137.2 (131.8 to 142.7)               |
|                               | Diabetes            | 1,995 (4.6%)   | 120.2 (115.0 to 125.6)               | 1,550 (3.6%)  | 85.6 (81.4 to 90.0)                  |
|                               | MACE                | 2,140 (5.0%)   | 129.1 (123.7 to 134.7)               | 825 (1.9%)    | 45.5 (42.4 to 48.7)                  |
|                               | CKD                 | 645 (1.5%)     | 39.0 (36.0 to 42.1)                  | 390 (0.9%)    | 21.6 (19.5 to 23.8)                  |

Table notes: CI: confidence interval; CKD: chronic kidney disease stages 3-5; ICU: intensive care unit; MACE: major adverse cardiovascular event. Adverse events calculated from hospital episodes to 31 August 2020, and primary care records and deaths registrations to 30 September 2020. 'Readmission' represents any admission after discharge for COVID-19 cases, and any post-index admission for controls. COVID-19 cases were matched to controls on baseline demographic characteristics (age, sex, ethnicity, region, Index of Multiple Deprivation quintile, smoking status) and clinical histories (hypertension, major adverse cardiovascular event, respiratory disease, chronic kidney disease, chronic liver disease, diabetes, cancer).

Supplementary Table 4. Rates and rate ratios of adverse events contrasting individuals with COVID-19 in England discharged from hospital by 31 August 2020 with matched controls, stratified by demographic factors

| Group (sample size)                 | Adverse event | Rate per 1,000 person-years (95% CI) |                        | Rate ratio (95% CI) |
|-------------------------------------|---------------|--------------------------------------|------------------------|---------------------|
|                                     |               | COVID-19 cases                       | Control group          |                     |
| Sex: Male (n = 26,245)              | Death         | 318.4 (307.5 to 329.6)               | 38.5 (34.9 to 42.3)    | 8.3 (7.5 to 9.2)    |
|                                     | Readmission   | 757.5 (740.7 to 774.7)               | 214.3 (205.8 to 223.1) | 3.5 (3.4 to 3.7)    |
|                                     | Respiratory   | 780.9 (763.8 to 798.3)               | 127.3 (120.7 to 134.1) | 6.1 (5.8 to 6.5)    |
|                                     | Diabetes      | 142.4 (135.2 to 150.0)               | 95.6 (90.0 to 101.6)   | 1.5 (1.4 to 1.6)    |
|                                     | MACE          | 130.7 (123.7 to 137.9)               | 43.0 (39.2 to 47.1)    | 3.0 (2.7 to 3.4)    |
|                                     | CKD           | 43.7 (39.7 to 48.0)                  | 20.5 (17.9 to 23.4)    | 2.1 (1.8 to 2.5)    |
| Sex: Female (n = 21,535)            | Death         | 322.0 (309.9 to 334.5)               | 44.8 (40.6 to 49.4)    | 7.2 (6.5 to 8.0)    |
|                                     | Readmission   | 776.4 (757.5 to 795.7)               | 224.5 (214.8 to 234.5) | 3.5 (3.3 to 3.6)    |
|                                     | Respiratory   | 757.6 (738.9 to 776.6)               | 131.4 (124.0 to 139.1) | 5.8 (5.4 to 6.1)    |
|                                     | Diabetes      | 107.9 (101.0 to 115.3)               | 74.2 (68.6 to 80.0)    | 1.5 (1.3 to 1.6)    |
|                                     | MACE          | 120.6 (113.2 to 128.3)               | 42.0 (37.9 to 46.5)    | 2.9 (2.5 to 3.2)    |
|                                     | CKD           | 32.5 (28.8 to 36.7)                  | 20.3 (17.5 to 23.5)    | 1.6 (1.3 to 1.9)    |
| Age group: <70 years (n = 25,955)   | Death         | 86.2 (80.7 to 91.9)                  | 6.1 (4.7 to 7.7)       | 14.1 (11.0 to 18.3) |
|                                     | Readmission   | 556.6 (542.6 to 570.8)               | 127.0 (120.5 to 133.8) | 4.4 (4.1 to 4.6)    |
|                                     | Respiratory   | 615.8 (601.1 to 630.8)               | 58.5 (54.1 to 63.1)    | 10.5 (9.7 to 11.4)  |
|                                     | Diabetes      | 123.9 (117.4 to 130.7)               | 73.2 (68.2 to 78.4)    | 1.7 (1.6 to 1.8)    |
|                                     | MACE          | 55.7 (51.4 to 60.4)                  | 13.0 (11.0 to 15.3)    | 4.3 (3.6 to 5.2)    |
|                                     | CKD           | 24.4 (21.6 to 27.5)                  | 6.9 (5.4 to 8.6)       | 3.5 (2.7 to 4.6)    |
| Age group: ≥70 years (n = 21,825)   | Death         | 658.4 (640.1 to 677.0)               | 85.6 (79.6 to 91.9)    | 7.7 (7.1 to 8.3)    |
|                                     | Readmission   | 1,069.0 (1,045.7 to 1,092.6)         | 334.2 (322.3 to 346.5) | 3.2 (3.1 to 3.3)    |
|                                     | Respiratory   | 994.2 (971.7 to 1,017.0)             | 217.8 (208.2 to 227.7) | 4.6 (4.3 to 4.8)    |
|                                     | Diabetes      | 131.3 (123.2 to 139.8)               | 102.1 (95.6 to 109.0)  | 1.3 (1.2 to 1.4)    |
|                                     | MACE          | 227.9 (217.3 to 239.0)               | 79.7 (74.0 to 85.8)    | 2.9 (2.6 to 3.1)    |
|                                     | CKD           | 59.3 (53.9 to 65.1)                  | 37.4 (33.5 to 41.6)    | 1.6 (1.4 to 1.8)    |
| Ethnic group: White (n = 34,355)    | Death         | 403.4 (392.5 to 414.5)               | 53.1 (49.4 to 57.0)    | 7.6 (7.0 to 8.2)    |
|                                     | Readmission   | 876.8 (860.7 to 893.2)               | 263.6 (255.3 to 272.2) | 3.3 (3.2 to 3.5)    |
|                                     | Respiratory   | 861.1 (845.1 to 877.3)               | 164.5 (157.9 to 171.3) | 5.2 (5.0 to 5.5)    |
|                                     | Diabetes      | 119.6 (113.6 to 125.7)               | 85.5 (80.8 to 90.4)    | 1.4 (1.3 to 1.5)    |
|                                     | MACE          | 153.4 (146.7 to 160.3)               | 53.9 (50.2 to 57.9)    | 2.8 (2.6 to 3.1)    |
| Ethnic group: Non-White (n = 8,315) | Death         | 126.6 (115.0 to 139.0)               | 12.7 (9.3 to 16.9)     | 10.0 (7.3 to 13.8)  |
|                                     | Readmission   | 553.7 (529.2 to 579.0)               | 126.1 (114.8 to 138.2) | 4.4 (4.0 to 4.9)    |
|                                     | Respiratory   | 567.8 (543.0 to 593.4)               | 49.9 (42.9 to 57.8)    | 11.4 (9.8 to 13.3)  |
|                                     | Diabetes      | 184.1 (170.1 to 198.9)               | 121.1 (110.1 to 133.0) | 1.5 (1.3 to 1.7)    |
|                                     | MACE          | 68.2 (59.8 to 77.4)                  | 18.8 (14.6 to 23.8)    | 3.6 (2.8 to 4.8)    |

Table notes: CI: confidence interval; CKD: chronic kidney disease stages 3-5; MACE: major adverse cardiovascular event. Adverse events calculated from hospital episodes to 31 August 2020, and primary care records and deaths registrations to 30 September 2020. 'Readmission' represents any admission after discharge for COVID-19 cases, and any post-index admission for controls. COVID-19 cases were matched to controls on baseline demographic characteristics (age, sex, ethnicity, region, Index of Multiple Deprivation quintile, smoking status) and clinical histories (hypertension, major adverse cardiovascular event, respiratory disease, chronic kidney disease, chronic liver disease, diabetes, cancer). Rates and rate ratios for CKD could not be stratified by ethnic group due to insufficient event counts in the control group.
